1 **Genomic signatures of honey bee association in an acetic acid symbiont**

2

3 Eric A. Smith<sup>a</sup> and Irene L. G. Newton<sup>a</sup>#

4

5 <sup>a</sup>Department of Biology, Indiana University, Bloomington, Indiana, USA

6

7 Running head: Evolutionary signatures in an acetic acid symbiont

8

9 #Address correspondence to Irene L. G. Newton: [irnewton@indiana.edu](mailto:irnewton@indiana.edu)

10

11

12

13

14

15

16

17

18

19

20

21

22

23 **ABSTRACT**

24 Honey bee queens are central to the success and productivity of their colonies; queens are the  
25 only reproductive members of the colony, and therefore queen longevity and fecundity can  
26 directly impact overall colony health. Recent declines in the health of the honey bee have  
27 startled researchers and lay people alike as honey bees are the most important pollinators in  
28 agriculture. Honey bees are important pollinators of many major crops and add billions of  
29 dollars annually to the US economy through their services. One factor that may influence queen  
30 and colony health is the microbial community. Although honey bee worker guts have a  
31 characteristic community of bee-specific microbes, the honey bee queen digestive tracts are  
32 colonized predominantly by a single acetic acid bacterium: *Parasaccharibacter apium*. This  
33 bacterium is related to flower-associated microbes such as *Saccharibacter floricola*, and initial  
34 phylogenetic analyses placed it as sister to these environmental bacteria. We used comparative  
35 genomics of multiple bee-associated strains and the flower-associated *Saccharibacter* to  
36 identify genomic changes associated with the ecological transition to bee association. We  
37 identified several genomic differences in the bee-associated strains, including a complete  
38 CRISPR/Cas system. Many of the changes we note here are predicted to confer upon them the  
39 ability to survive in royal jelly and defend themselves against mobile elements, including  
40 phages. Our results are a first step towards identifying potential benefits provided by the honey  
41 bee queen microbiota to the matriarch of the colony.

42

43

44

45 **IMPORTANCE**

46 The health of the world's most important agricultural pollinator, the honey bee, depends on the  
47 health of the matriarchs: honey bee queens. These queens are colonized by a specific microbe  
48 not found in associated workers but instead, present in the diet given to queen bees. Here we  
49 identified genomic signatures of the transition to bee association in this microbe, showing that  
50 the queen-associated microbe has adapted to the acids present in honey and royal jelly through  
51 the acquisition of acid resistance genes and an enzyme important in de-acidification. Our  
52 results highlight potential benefits provided to the queen by her microbial associates.

53

54 **INTRODUCTION**

55 The honey bee (*Apis mellifera*) is extremely important economically because of the  
56 pollination services it provides to numerous agricultural crops. As a result, there is increasing  
57 interest in determining how the microbiome supports and influences bee function. While a  
58 honey bee colony is made up of bees with diverse roles, or castes, the majority of studies on  
59 bee microbiomes have focused on workers specifically. The microbial community of worker  
60 bees consists of eight to ten core bacterial species (1-6). The characterization of these groups  
61 led to speculation about their role in honey bee health and whether or not they provision  
62 nutrients (5) or assist in the breakdown of plant-derived carbohydrates, as is the case in other  
63 insect-microbe interactions (7-9). There has also been speculation as to the role of the  
64 microbiome in resistance to pathogens, as microbial communities have been shown to protect  
65 the bumble bee (*Bombus terrestris*) from the parasite *Crithidia bombi* (10). Honey bee-  
66 associated microbes interact with each other in diverse ways both *in vitro* and *in vivo*,

67 suggesting that they may interact syntrophically within workers (2, 11). While these studies  
68 focused on honey bee workers are intriguing, it is surprising that only recently was the  
69 microbiome of queen bees throughout development recently characterized (12).

70 Interestingly, the microbial community associated with queen bees is vastly different  
71 than associated workers and is comprised of a large percentage of acetic acid bacteria, a group  
72 of bacteria present only at very small percentages in workers. One of the primary bacteria that  
73 differentiate queens from workers is the recently described *Parasaccharibacter apium* (13). *P.*  
74 *apium* is in the family *Acetobacteraceae* and occupies defined niches within the hive, including:  
75 queen guts, nurse hypopharyngeal glands, nurse crops, and royal jelly, and is only rarely found  
76 outside of these areas (14, 15). Evidence suggests that it might play a role in protecting  
77 developing larvae and queens from pathogens such as *Nosema* (13, 16). Given that *P. apium*  
78 makes up a large proportion of the queen gut microbiome, it is possible that it plays an  
79 important role in queen nutrition, protection from pathogens, and possibly modulating queen  
80 fertility, fecundity, and longevity (17).

81 *P. apium* is part of a clade of acetic acid bacteria (AAB, a group within the family  
82 *Acetobacteraceae*) that contains both free-living and bee-associated members. Comparative  
83 genomics, then, can give us insights into the changes associated with the transition to bee-  
84 association in this clade. This comparison can also help elucidate what sets *P. apium* apart from  
85 closely related species and the role(s) it might be playing in the hive environment. To that end,  
86 we used the genomes of four recently announced *P. apium* strains (18), an unpublished *P.*  
87 *apium* genome assembly, as well as four genomes of the closely-related genus *Saccharibacter*  
88 (19-21), and a genome of the bumblebee symbiont, *Bombella intestini* (22), to begin to tease

89 apart the unique capabilities of *P. apium*. Insights gained here could prove critical in  
90 determining the factors responsible for maintaining queen health in colonies and could  
91 ultimately lead to the development of interventions to improve queen health and mitigate the  
92 detrimental impacts of queen failure on this economically critical species.

93

## 94 **RESULTS**

### 95 *Acetic acid bacteria phylogeny*

96 To robustly determine where the *Parasaccharibacter apium* strains and *Saccharibacter*  
97 spp. are placed among the AAB, we constructed a maximum likelihood phylogeny using 16S  
98 rRNA sequences derived from each of the 17 AAB genera. Our final tree largely agrees with  
99 previously published ABB phylogenies (Figure 1) (23-26). Bootstrap support along the backbone  
100 of the tree is low, likely owing to the inclusion of sequences from multiple strains of the same  
101 species with little sequence divergence. Sequences were largely grouped into monophyletic  
102 clades by genus, with one exception; the genus *Gluconacetobacter* is split into a paraphyletic  
103 grade, with each branch dominated by a different *Gluconacetobacter* species (clades 1-5, Figure  
104 1A). *Parasaccharibacter* plus *Saccharibacter* comes out as sister to the *Gluconobacter* clade,  
105 and the clade encompassing all three of these genera (clade 6, Figure 1A) is sister to  
106 *Acetobacter*. Within the *Parasaccharibacter/Saccharibacter* clade, the flower-associated *S.*  
107 *floricola* is sister to the remaining clade (clade 7, Figure 1B), comprised of a mix of taxonomic  
108 classifications from *Parasaccharibacter*, *Saccharibacter*, and *Bombella* species. The inconsistent  
109 taxonomic nomenclature of the microbes within this clade is typified by the *Parasaccharibacter*  
110 classification, which is applied to one *P. apium* strain (AS1), which clusters with a handful of

111 uncharacterized *Acetobacteraceae* bacteria (clade 8, Figure 1B), to the exclusion of all the other  
112 *P. apium* and *Saccharibacter* strains. It should be noted that, while the genome for *P. apium*  
113 AS1 is on GenBank, little else is known about this strain. Further taxonomic ambiguity is  
114 highlighted by the presence of a member of a completely separate genus, *Bombella apis*,  
115 grouped squarely among *P. apium* and *Saccharibacter* strains, indicating that it is likely a  
116 member of one of those two genera. However, branch lengths within this clade are generally  
117 short, especially among the main *Parasaccharibacter/Saccharibacter* clade (clade 9, Figure 1B),  
118 making it difficult to resolve exact relationships.

119

#### 120 *Core ortholog phylogeny of Parasaccharibacter apium and Saccharibacter strains*

121 We used OrthoMCL (v2.0.9 (27)) to define clusters of orthologous genes (COGs) using  
122 the *Parasaccharibacter*, *Saccharibacter*, and *Bombella* genomes listed in Table 1; *Gluconobacter*  
123 *oxydans* H24 was used as an outgroup (see Supplementary Information for more detail; Table  
124 S1). To better resolve the phylogenetic relationships between *P. apium*, *Saccharibacter* spp.,  
125 and *Bombella intestini*, we constructed a second maximum likelihood phylogeny using aligned  
126 and concatenated amino acid sequences of the 1,259 single-copy COGs. This robustly supported  
127 amino acid phylogeny broadly agrees with our previously constructed 16S phylogeny (Figure 2).  
128 In the core ortholog tree, *B. intestini* interrupts the monophyly of honey bee-associated  
129 *Saccharibacter* spp plus *P. apium*. Notably, this tree groups *B. intestini* more closely to the  
130 majority of the *P. apium* strains, while *P. apium* AS1 is more distantly related. Similar to the 16S  
131 tree, we again see quite short branch lengths within the bee-associated AAB species,

132 particularly among those in clade D, which includes all *P. apium* and *Saccharibacter* genomes  
133 except *P. apium* AS1 and *S. floricola* (Figure 2).

134           Given the discrepancy between nomenclature and phylogeny and the short branch  
135 lengths, we calculated genome-wide Average Nucleotide Identity (gANI) and aligned fraction  
136 (AF) to clarify species relationships. All pairwise comparisons between genomes in clade D met  
137 both gANI and AF thresholds for being considered the same species (namely, gANI > 96.5 and  
138 AF > 0.6 (28)), while no other genome pairs reach both thresholds (Figures S1 and S2). Because  
139 of the genetic similarity within clade D and phylogenetic distinction from the rest of the  
140 genomes in this tree, the remainder of our analyses focus largely on this clade; for clarity we  
141 will refer to this clade as the '*Parasaccharibacter* clade' from here forward.

142

#### 143 *Signatures of bee association in the P. apium genomes*

144           To identify genes associated with the transition to bee association, we identified COGs  
145 that contained at least one gene from each bee-associated AAB genome (*Parasaccharibacter*  
146 clade, *B. intestini*, and *P. apium* AS1) and were also missing in *S. floricola*. There were a total of  
147 1,286 COGs containing at least one gene from each of the aforementioned genomes, but only  
148 89 were also missing in *S. floricola*. We determined the putative functions of these genes using  
149 the *P. apium* reference genome representative for each COG (Table S2). It should be noted that  
150 all annotations discussed from here forward are putative and require further functional  
151 characterization.

152           Several bee-associated unique genes stood out as particularly interesting, the first being  
153 gluconolactonase. Lactonases, such as gluconolactonase, reversibly catalyze the hydrolysis of

154 lactones (such as gluconolactone) to the hydroxyl acid form (such as gluconic acid).  
155 Gluconolactone is found in both honey and royal jelly and is thought to be partially responsible  
156 for the antibacterial properties of both compounds (29). In water, this compound can be  
157 hydrolyzed into gluconic acid, acidifying the environment and preventing bacterial growth (30-  
158 32). The presence of this gene capable of reversing this acidification – at least locally – may  
159 explain how *Parasaccharibacter* is able to thrive in the presence of royal jelly (13). BLAST  
160 searches of the metatranscriptomes and metagenomes of bacteria in the “core” honey bee  
161 microbiome (33) resulted in zero hits, indicating that none of the “core” microbiome members  
162 possess a homolog of this gene. The presence of gluconolactonase may help explain the unique  
163 distribution of *Parasaccharibacter* within the hive. Another bee-associated unique gene is an  
164 HdeD family acid-resistance protein, which in *E. coli* participates in resistance to acids at high  
165 cell densities (34). The presence of this gene in *P. apium* may indicate an adaptation to living in  
166 low pH environments – such as the queen bee digestive tract or royal jelly (35).

167 An AI-2 E family transporter was identified as unique to the bee-associated AAB. AI-2 is  
168 an auto-inducer responsible for activating cascades associated with quorum sensing. While *P.*  
169 *apium* does not contain any AI-2 synthesis genes, the presence of an AI-2 E family transporter  
170 indicates that it may be responding to exogenous AI-2 produced by other bacteria, possibly in a  
171 competitive interaction. Bolstering the competition hypothesis is the presence of fusaric acid  
172 resistance (FUSC) genes in the *P. apium* genomes. Fusaric acid and its analogs can be quorum  
173 sensing inhibitors (36), so the presence of FUSC genes might be an adaptation that allows *P.*  
174 *apium* to evade quorum sensing inhibition attempts by other microbes. Alternatively, these  
175 FUSC genes may play a role in competition with fungal species. Fusaric acid is produced by



176 several species of fungus and is antibacterial (37). Therefore, the FUSC genes may play a role in  
177 *P. apium*'s protection of honey bee larvae and queens from infection with *Nosema* pathogens  
178 (16).

179 An invasion-associated locus B (*ialb*) protein was identified as present in bee-associated  
180 AAB, but absent in *S. floricola*. In *Bartonella bacilliformis*, *ialb* mutants are impaired in their  
181 ability to colonize human erythrocytes, suggesting a role for this protein in eukaryotic cell  
182 invasion (38). While it is not clear whether *P. apium* is ever intracellular, the presence of *ialb*  
183 suggests that it may have this capability.

184 The final set of genes of particular interest in this analysis is a complete Type I-E  
185 CRISPR/Cas cassette. To determine if this CRISPR/Cas cassette was active, we annotated the  
186 genomes for the presence of CRISPR arrays, and found that all of the genomes that have this  
187 CRISPR/Cas cassette contain multiple CRISPR arrays. It is possible that these CRISPR arrays were  
188 present in the most recent common ancestor of the *Parasaccharibacter* clade and have simply  
189 been maintained in these current genomes; if that were the case, we would expect the spacers  
190 in these CRISPR arrays to be highly similar between all strains. However, if these arrays are part  
191 of an active CRISPR/Cas system, we would expect the spacers to differ from strain to strain,  
192 reflecting unique challenges encountered by each strain. To rule out the possibility that these  
193 arrays are ancestral, we aligned each spacer sequence from a given genome to all other spacer  
194 sequences from the other genomes and calculated the percent identity. The minimum best  
195 intergenomic match for any spacer was 40%, while the maximum was just 65% identical over  
196 the length of the spacer, indicating that the spacer sequences are unique from genome to  
197 genome and the CRISPR/Cas systems identified here are likely active.

198 *B. intestini* was isolated from a bumble bee gut, so we also looked at genes that were  
199 unique to this bacterium to determine whether there are any obvious signatures of bumble bee  
200 association in its genome. There were a total of 65 genes that were unique to *B. intestini*,  
201 including a complete type IV secretion system (T4SS) and several genes involved in antibiotic  
202 production or resistance. Putative annotations of these 65 genes are in Table S3.

203

#### 204 *Identification of horizontally transferred gene regions*

205 Horizontal transfer of DNA between unrelated bacteria is a commonly known  
206 mechanism by which bacteria can acquire new traits and adapt to novel environments (39-42).  
207 We identified two regions of phage origin, one in *S. floricola* and one in the *P. apium* reference  
208 genome (Figure 3; see Supplementary Information for more detail). Movement and insertion of  
209 bacteriophage sequences in a genome can have profound effects on the evolution of that  
210 genome (43-45) and future work will determine whether these phage are lytic and what their  
211 host ranges may be. To determine whether the bacteria in the *Parasaccharibacter* clade have  
212 undergone other potential horizontal gene transfer (HGT) events, we determined the spatial  
213 distribution of genes of particular interest (e.g. clade-specific, species-specific, or strain-specific  
214 genes) across the bacterial genomes (Figure 3). Some of the genes specific to different clades  
215 occur in clusters, an indication that they may have originated elsewhere and been horizontally  
216 inherited as a chunk of contiguous DNA. We then looked for anomalies in sequence  
217 composition (%GC) and phylogeny to determine whether they were putatively horizontally  
218 transferred. Using this combination of methods, we identified a total of five HGT regions in the

219 *Parasaccharibacter* clade, which we have numbered 1-5 (see Table S4 for %GC and lineage  
220 probability index (LPI)-difference deviations for each gene in each HGT).

221 HGT1 (Figure 4A) is present in all genomes in the *Parasaccharibacter* clade, and contains  
222 10 genes, although *P. apium* C6 is missing one of the genes (the second-to-last gene at the 3'  
223 end of the HGT, annotated as an ABC transport auxiliary component). The three most 5' genes  
224 show homology to YfaP (an uncharacterized conserved protein), SrfB (part of the surfactin  
225 antibiotic synthesis machinery), and an uncharacterized bacterial virulence factor. The genes in  
226 the 3' half of this HGT contain a number of domains involved in membrane transport. We  
227 hypothesize that the two halves of this HGT work together to synthesize and export antibiotics  
228 as a form of defense or regulation of competing bacteria. Lending support to the hypothesis  
229 that this HGT is involved in defense or immunity is the fact that a CRISPR array lies immediately  
230 5' of this HGT in each genome (Table S5). Bacterial defense mechanisms tend to occur in  
231 clusters of "defense islands" (46), so the presence of this CRISPR array is perhaps a further  
232 indication of this HGTs role in bacterial immunity.

233 HGTs 2 and 3 (Figure 4B and 4C) are restricted solely to the *P. apium* reference genome  
234 and are both bacterial restriction-modification (R-M) systems. Bacterial R-M systems are a  
235 defense against invading DNA (i.e. bacteriophage). They act by methylating host DNA at specific  
236 sites; invading DNA with the same recognition site will be un-methylated, recognized as foreign,  
237 and targeted for degradation (47). HGT2 contains 6 genes, which make up the core components  
238 of a bacterial (R-M) system. Interestingly, the domain architecture in this R-M system has been  
239 recognized as a precursor to eukaryotic defenses against transposable elements (48). HGT3  
240 (Figure 4C) consists of 3 genes comprising 5 domains; the 5'-most gene consists of a predicted

241 restriction-modification DNA methylase coupled to a specificity domain, the middle gene is  
242 predicted to be an XhoI restriction enzyme, and the 3'-most gene is a PHP phosphoesterase  
243 coupled to a RecN DNA repair ATPase. Taken together, it appears that HGTs 2 and 3 are  
244 responsible for recognition of and defense against foreign DNA.

245 HGT4 (Figure 4D) is present in all *P. apium* genomes in the *Parasaccharibacter* clade and  
246 contains 3 genes: two GDP-D-mannose dehydratases (GMD) and an O-linked N-  
247 acetylglucosamine transferase (OGT). GMD plays a role in the metabolism of mannose and  
248 fructose, sugars commonly found in nectar (49). The presence of GMD in *P. apium* genomes  
249 might allow for the consumption of nectar or nectar components by these bacteria. OGT, on  
250 the other hand, plays a role in post-translational modification of thousands of identified  
251 proteins (50). However, while OGT-mediated post-translational modification is common in  
252 eukaryotes, it is far more rare in bacteria (51). To date, only a handful of prokaryotic OGTs have  
253 been identified, and the targets of these OGTs remain unclear (52, 53). Given the role OGTs  
254 play in eukaryotic post-translational modification and the fact that many bacterial effector  
255 proteins show homology to eukaryotic proteins (54), it is possible that the presence of OGT in *P.*  
256 *apium* represents a pathway for host-microbe interaction and symbiont-mediated protein  
257 modification.

258 HGT5 (Figure 4E) is unique to the *P. apium* strains A29, B8, and C6, all strains that had  
259 been isolated from honey bee larvae. Like HGTs 1-3, HGT5 contains genes that may play a role  
260 in protection against foreign DNA. There are four genes in the 5' section of HGT5, three of  
261 which are kinases, and the fourth contains a SAD/SRA domain in its 5' end, and an HNH  
262 endonuclease domain in its 3' end. In bacteria, the SAD/SRA domain is often found associated

263 with an HNH domain (55) and it is thought that the two domains act together to recognize and  
264 cleave foreign DNA (56). The 3' section of HGT5 consists of a conjugative relaxase, a TraG/TraD  
265 family ATPase (a coupling protein involved in bacterial conjugation and/or T4SS), a homolog of  
266 the pyocin activator protein PrtN, a homolog of a yeast RNA polymerase I subunit, and two  
267 additional genes with no annotations. The presence of a PrtN homolog is particularly  
268 interesting, as in *Pseudomonas aeruginosa* pyocins are antibacterial agents, often acting to  
269 depolarize the membrane of target cells (57),(58). Interestingly, one of the two unannotated  
270 genes in the 3' region of HGT5 shows weak homology to a phage shock protein, which are  
271 proteins involved in the response to stress that may weaken the energy status of the cell (59).  
272 This protein, then, may play a part in immunity to membrane depolarization. Given the  
273 presence in HGT5 of: an HNH endonuclease coupled to a SAD/SRA domain, a conjugative  
274 relaxase, a TraG/TraD family ATPase, a pyocin activator protein, and a protein with at least  
275 some homology to a phage shock protein, we hypothesize that it may play a role in  
276 pathogenesis or defense.

277

## 278 **DISCUSSION**

279 Here, we used the genomes of five *P. apium* strains, four *Saccharibacter* strains, and the  
280 closely related *B. intestini* to gain insight into the genomic changes associated with the  
281 transition to honey bee symbiosis in this group. We note several genomic differences – some of  
282 which were horizontally acquired – between bee-associated bacteria and the flower-associated  
283 *S. floricola* that may have allowed for the expansion of *P. apium* into previously unoccupied  
284 niches within the honey bee colony. These differences can be classified as changes that

285 introduce: 1) novel metabolic capabilities, 2) defense and/or virulence mechanisms, and 3)  
286 mechanisms for interaction with other microbes and/or the host.

287 Metabolic genes identified here include gluconolactonase, which may allow for the de-  
288 acidification of royal jelly (29-32), and two copies of GMD, a gene that plays a role in the  
289 metabolism of mannose and fructose, components of nectar and honey (49). Distinct defense  
290 and/or virulence mechanisms were identified, including: a functional CRISPR/Cas system, two R-  
291 M systems, and an HGT with some homology to known virulence mechanisms. Interestingly,  
292 the R-M systems were identified in the only genome in the clade that also contains a phage  
293 sequence (the *P. apium* reference sequence). Restriction modification systems, like phages, can  
294 act as selfish genetic elements (60), so their presence in this genome may indicate that it was  
295 historically more permissive to invading DNA. These R-M systems may also have been coopted  
296 by the prophage to prevent super-infection with additional phages (61).

297 Genes involved in the interaction with other microbes and/or the host that we identified  
298 include: an AI-2 family transporter, fusaric acid resistance genes, *ialb*, and *ogt*. Given that *P.*  
299 *apium* does not encode any of the canonical genes for the production of quorum-sensing  
300 molecules, it seems likely that *P. apium* is responding to exogenous AI-2 (and/or fusaric acid  
301 and its analogs) produced by other members of the bee microbiome (62). The *ialb* and *ogt*  
302 genes provide routes for interaction with the host, as *ialb* may play a role in eukaryotic cell  
303 invasion (38) and *ogt* is known to modify thousands of eukaryotic proteins (50). Taken together,  
304 we hypothesize that the novel combination of metabolic, quorum-sensing, defense/virulence,  
305 and eukaryotic interaction genes in the *Parasaccharibacter* clade genomes allowed for the

306 utilization of a unique food source and protection from an onslaught of previously un-  
307 encountered challenges and facilitated the transition to honey bee association in this clade.  
308 *P. apium* has been shown to benefit honey bee larval development and provide  
309 protection against *Nosema* (16). Some of the genes identified here, while allowing *P. apium* to  
310 transition to honey bee symbiosis, may also be related to its ability to protect the bee host from  
311 infection with *Nosema* or other pathogens. If indeed these genes are responsible for the  
312 transition to, and maintenance of, honey bee symbiosis, we would expect to see a modified  
313 evolutionary trajectory relative to those genes not involved in the symbiosis. We currently lack  
314 sufficient sampling of non-bee-associated bacteria in this clade to do such analyses; however,  
315 future studies addressing this question should allow for further elucidation of the genes  
316 involved in the transition to honey bee association. Those analyses, coupled with functional  
317 characterization of the genes of interest identified here, should lay the foundation for the  
318 development of beneficial intervention strategies in this economically critical insect.

319

## 320 **METHODS**

### 321 *Acetic acid bacteria phylogeny*

322 To determine the placement of *Parasaccharibacter* and *Saccharibacter* among the AAB,  
323 we downloaded all 16S rRNA sequences from the Silva database (63-65) that met the following  
324 criteria: 1) from a species belonging to one of the seventeen genera of AAB (26), 2) length at  
325 least 1200 bases, and 3) sequence quality >90. Additionally, the 16S sequence for *Rhodopila*  
326 *globiformis* – which is in the family *Acetobacteraceae* but is not part of AAB – was included as  
327 an outgroup. Given the close relation to *Saccharibacter floricola*, 16S sequences for *Bombella*

328 *intestini* (66) and *Bombella sp.* MRM1 (*Bombella apis*)(67) were included. We BLASTed the  
329 *Saccharibacter floricolca* 16S sequence against the *Parasaccharibacter* and *Saccharibacter*  
330 genomes (Table 1) to pull out their respective 16S sequences for use in this phylogeny. All  
331 sequences were aligned using the SINA aligner (68); parameters used were set using the --auto  
332 option. A maximum likelihood phylogeny was constructed using RAxML with the GTRGAMMA  
333 substitution model and 1000 bootstrap replicates (v8.2.11, (69)). The final tree was visualized  
334 using FigTree (v1.4.2, <http://tree.bio.ed.ac.uk/software/figtree/>).

335

### 336 *Orthology analysis*

337 To facilitate downstream analyses, we clustered genes from all genomes in Table 1 –  
338 plus *Gluconobacter oxydans* H24 as an outgroup – into clusters of orthologous genes (COGs)  
339 using OrthoMCL (v.2.0.9, (27)). Amino acid sequences were downloaded from NCBI and  
340 clustering was performed using default OrthoMCL parameters. These clusters were then  
341 classified as single-copy orthologs (defined as containing exactly one representative from each  
342 genome), variable (defined as missing a representative from at least one genome and having  
343 varying numbers of representatives from each of the other genomes), multi-copy ortholog  
344 (containing at least one representative from each genome, but multiple copies from at least  
345 one genome), or genome-specific (containing at least two genes that all came from the same  
346 genome) using an in-house Perl script.

347

348

349



350 *Parasaccharibacter and Saccharibacter core ortholog phylogeny*

351 We constructed a phylogeny using concatenated amino acid alignments of all single-  
352 copy COGs. The amino acid sequences were aligned using the MAFFT L-INS-I algorithm (v7.310,  
353 (70)), and alignments were then concatenated, and used to construct a maximum likelihood  
354 phylogeny using RAxML with substitution model PROTGAMMALGF and 1000 bootstrap  
355 replicates (v8.2.11, (69)). The final tree was visualized using FigTree (v1.4.2,  
356 <http://tree.bio.ed.ac.uk/software/figtree/>).

357

358 *Calculation of genomic similarity*

359 To determine relatedness and species assignment, we calculated genome-wide Average  
360 Nucleotide Identity (gANI) and aligned fraction (AF) for each pairwise comparison using  
361 ANIcalculator (28). Predicted transcript sequences for each pairwise comparison were passed to  
362 the software, which output gANI and AF in each direction for the pairwise comparison. As gANI  
363 and AF can vary depending on the direction of comparison due to differences in genome length,  
364 we report the average of the pairwise calculations in each direction.

365

366 *Synteny analysis*

367 We used Mauve (71, 72) to determine the syntenic regions between the  
368 *Parasaccharibacter apium* and *Saccharibacter* spp. genomes. The *Parasaccharibacter apium*  
369 reference genome is resolved to a single chromosome, so it was used as the reference  
370 sequence in Mauve's "move contigs" tool, and the likely order and orientation of contigs in the  
371 other genomes was determined. To facilitate downstream analyses, the output of Mauve's

372 “move contigs” tool was used to order, orient, and concatenate contigs into single pseudo-  
373 chromosomes for each genome. Structural rearrangements were then visualized using Mauve’s  
374 built-in graphical interface.

375

#### 376 *Annotation of CRISPR arrays and phage sequences*

377 Pseudo-chromosomes for each genome were uploaded to CRISPRFinder to determine  
378 location and sequence of CRISPR arrays (73). We used an in-house Perl script to determine the  
379 maximum intergenomic percent identity of spacer sequences. We used PHAge Search Tool  
380 Enhanced Release (PHASTER) (74, 75) to define phage-like regions. Any region determined to be  
381 “questionable” or “intact” by PHASTER that also appeared as an insertion in the host genome in  
382 our synteny analysis was labeled as likely to be of phage origin.

383

#### 384 *Determination of bee-associated bacteria-specific orthologs*

385 We identified all COGs that contained at least one gene from each genome of bee-  
386 associated bacteria and no genes from *S. floricola*. We then took the *P. apium* reference  
387 genome representative for each of these COGs and got KEGG annotations for as many as  
388 possible using BlastKOALA (76). For those genes that we were not able to get KEGG  
389 annotations, we used NCBI’s BLAST to aid in determining potential function of these bee-  
390 associated bacteria-specific genes. This list of genes and their potential functions was then  
391 manually curated to hypothesize genes that may have allowed for the transition to bee-  
392 association.

393

394 *Analysis of horizontal gene transfers*

395           To determine whether or not genes in any of the *Parasaccharibacter* and *Saccharibacter*  
396 genomes arrived via horizontal transfer, we employed a combination of sequence-composition,  
397 phylogenetic, and synteny approaches. We mapped genes of particular interest (e.g. genes  
398 unique to certain clades, species, or strains) to their locations on the linear pseudo-  
399 chromosomes constructed during synteny analysis. Additionally, we calculated the %GC for  
400 each gene. We then determined how many standard deviations each gene was from the  
401 genome-wide mean %GC. The third prong of this analysis involved identifying genes that were  
402 phylogenetically aberrant. To do this, we used Darkhorse (77) to calculate the lineage  
403 probability index (LPI) twice for each gene, once including BLAST hits to *Parasaccharibacter* and  
404 *Saccharibacter* subject sequences, and once excluding such hits. In doing so, genes that are  
405 likely to be horizontally transferred will have a larger discrepancy between LPI values than  
406 genes that were vertically inherited (see supplemental methods for details). We then identified  
407 regions as likely to be HGTs if they met the following criteria: 1) a block of at least three  
408 syntenic genes that show interesting phylogenetic distributions (e.g. unique to clade, species,  
409 or strain) where 2) a majority of genes in the region are at least 1 standard deviation from the  
410 mean %GC or LPI difference (or both).

411

412 *Domain annotation of genes of interest*

413           We used HHpred (<https://toolkit.tuebingen.mpg.de/#/tools/hhpred>, (78)) to determine  
414 domain architecture and gain an understanding of potential function of the genes in each HGT.  
415 For genes of interest that were part of a COG, all members of the COG were first aligned using

416 the MAFFT L-INS-I algorithm (v7.310, (70)). These multiple sequence alignments (or single  
417 amino acid sequences in the case of strain-unique genes) were then uploaded to HHpred's  
418 online tool and homology was determined using HMMs in the COG\_KOG\_v1.0, Pfam-A\_v31.0,  
419 and SMART\_v6.0 databases; only domains scoring above 60% probability are discussed here.  
420 Gene models for each region of interest were then constructed and visualized using the HHpred  
421 results and in-house R scripts. HGT5 occurs at the junction of two contigs in the linear pseudo-  
422 chromosomes we constructed. The abutting ends of each contig have annotations for partial  
423 pseudogenes, such that when they are joined a complete gene is created. We BLASTed the  
424 nucleotide sequence of this gene against the NCBI nr database to determine a putative  
425 function.

426

## 427 **ACKNOWLEDGEMENTS**

428 We thank Amelia R.I. Lindsey for feedback on initial versions of this manuscript. E.A.S. was  
429 supported by a Faculty Research Support grant from Indiana University.

430

## 431 **REFERENCES**

- 432 1. Martinson VG, Danforth BN, Minckley RL, Rueppell O, Tingek S, Moran NA. 2011. A  
433 simple and distinctive microbiota associated with honey bees and bumble bees. *Mol Ecol*  
434 20:619–628.
- 435 2. Martinson VG, Moy J, Moran NA. 2012. Establishment of Characteristic Gut Bacteria  
436 during Development of the Honeybee Worker. *Appl Environ Microbiol* 78:2830–2840.
- 437 3. Moran NA, Hansen AK, Powell JE, Sabree ZL. 2012. Distinctive Gut Microbiota of Honey  
438 Bees Assessed Using Deep Sampling from Individual Worker Bees. *PLoS ONE* 7.

439

- 440 4. Sabree ZL, Hansen AK, Moran NA. 2012. Independent Studies Using Deep Sequencing  
441 Resolve the Same Set of Core Bacterial Species Dominating Gut Communities of Honey  
442 Bees. PLoS ONE 7.
- 443 5. Moran NA. 2015. Genomics of the honey bee microbiome. *Curr Opin Insect Sci* 10:22–28.
- 444 6. Anderson KE, Rodrigues PAP, Mott BM, Maes P, Corby-Harris V. 2016. Ecological  
445 Succession in the Honey Bee Gut: Shift in *Lactobacillus* Strain Dominance During Early  
446 Adult Development. *Microb Ecol* 71:1008–1019.
- 447 7. McCutcheon JP, Moran NA. 2007. Parallel genomic evolution and metabolic  
448 interdependence in an ancient symbiosis. *Proc Natl Acad Sci USA* 104:19392–19397.
- 449 8. Gündüz EA, Douglas AE. 2009. Symbiotic Bacteria Enable Insect to Use a Nutritionally  
450 Inadequate Diet. *Proceedings: Biological Sciences* 276:987–991.
- 451 9. Douglas AE. 2013. Microbial Brokers of Insect-Plant Interactions Revisited. *J Chem Ecol*  
452 39:952–961.
- 453 10. Koch H, Schmid-Hempel P. 2011. Socially transmitted gut microbiota protect bumble  
454 bees against an intestinal parasite. *Proc Natl Acad Sci USA* 108:19288–19292.
- 455 11. Rokop ZP, Horton MA, Newton ILG. 2015. Interactions between Cooccurring Lactic Acid  
456 Bacteria in Honey Bee Hives. *Appl Environ Microbiol* 81:7261–7270.
- 457 12. Tarpy DR, Mattila HR, Newton ILG. 2015. Development of the Honey Bee Gut  
458 Microbiome throughout the Queen-Rearing Process. *Appl Environ Microbiol* 81:3182–  
459 3191.
- 460 13. Corby-Harris V, Snyder LA, Schwan MR, Maes P, McFrederick QS, Anderson KE. 2014.  
461 Origin and Effect of Alpha 2.2 Acetobacteraceae in Honey Bee Larvae and Description of  
462 *Parasaccharibacter apium* gen. nov., sp nov. *Appl Environ Microbiol* 80:7460–7472.
- 463 14. Anderson KE, Sheehan TH, Mott BM, Maes P, Snyder L, Schwan MR, Walton A, Jones BM,  
464 Corby-Harris V. 2013. Microbial Ecology of the Hive and Pollination Landscape: Bacterial  
465 Associates from Floral Nectar, the Alimentary Tract and Stored Food of Honey Bees (*Apis*  
466 *mellifera*). PLoS ONE 8.
- 467 15. Vojvodic S, Rehan SM, Anderson KE. 2013. Microbial Gut Diversity of Africanized and  
468 European Honey Bee Larval Instars. PLoS ONE 8.
- 469 16. Corby-Harris V, Snyder L, Meador CAD, Naldo R, Mott B, Anderson KE. 2016.  
470 *Parasaccharibacter apium*, gen. nov., sp nov., Improves Honey Bee (Hymenoptera:  
471 Apidae) Resistance to *Nosema*. *J Econ Entomol* 109:537–543.

472

- 473 17. Anderson KE, Ricigliano VA, Mott BM, Copeland DC, Floyd AS, Maes P. 2018. The queen's  
474 gut refines with age: longevity phenotypes in a social insect model. *Microbiome* 6:108.
- 475 18. Corby-Harris V, Anderson KE. 2018. Draft Genome Sequences of Four *Parasaccharibacter*  
476 *apium* Strains Isolated from Honey Bees. *Genome Announc* 6:e00165–18.
- 477 19. Jojima Y, Mihara Y, Suzuki S, Yokozeki K, Yamanaka S, Fudou R. 2004. *Saccharibacter*  
478 *floricola* gen. nov., sp nov., a novel osmophilic acetic acid bacterium isolated from pollen.  
479 *Int J Syst Evol Microbiol* 54:2263–2267.
- 480 20. Chouaia B, Gaiarsa S, Crotti E, Comandatore F, Degli Esposti M, Ricci I, Alma A, Favia G,  
481 Bandi C, Daffonchio D. 2014. Acetic Acid Bacteria Genomes Reveal Functional Traits for  
482 Adaptation to Life in Insect Guts. *Genome Biol Evol*, 3rd ed. 6:912–920.
- 483 21. Veress A, Wilk T, Kiss J, Olasz F, Papp PP. 2017. Draft Genome Sequences of  
484 *Saccharibacter* sp. Strains 3.A.1 and M18 Isolated from Honey and a Honey Bee (*Apis*  
485 *mellifera*) Stomach. *Genome Announc* 5:e00744–17.
- 486 22. Li L, Illegghems K, Van Kerrebroeck S, Borremans W, Cleenwerck I, Smagghe G, De Vuyst L,  
487 Vandamme P. 2016. Whole-Genome Sequence Analysis of *Bombella intestini* LMG  
488 28161(T), a Novel Acetic Acid Bacterium Isolated from the Crop of a Red-Tailed Bumble  
489 Bee, *Bombus lapidarius*. *PLoS ONE* 11.
- 490 23. Roh SW, Nam Y-D, Chang H-W, Kim K-H, Kim M-S, Ryu J-H, Kim S-H, Lee W-J, Bae J-W.  
491 2008. Phylogenetic characterization of two novel commensal bacteria involved with  
492 innate immune homeostasis in *Drosophila melanogaster*. *Appl Environ Microbiol*  
493 74:6171–6177.
- 494 24. Cleenwerck I, De Vos P, De Vuyst L. 2010. Phylogeny and differentiation of species of the  
495 genus *Gluconacetobacter* and related taxa based on multilocus sequence analyses of  
496 housekeeping genes and reclassification of *Acetobacter xylinus* subsp. *sucrofermentans*  
497 as *Gluconacetobacter sucrofermentans* (Toyosaki et al. 1996) sp. nov., comb. nov. *Int J*  
498 *Syst Evol Microbiol* 60:2277–2283.
- 499 25. Matsutani M, Hirakawa H, Yakushi T, Matsushita K. 2011. Genome-wide phylogenetic  
500 analysis of *Gluconobacter*, *Acetobacter*, and *Gluconacetobacter*. *FEMS Microbiol Lett*  
501 315:122–128.
- 502 26. Yamada Y. 2016. Systematics of Acetic Acid Bacteria, pp. 1–50. *In* *Acetic Acid Bacteria*,  
503 3rd ed. Springer, Tokyo, Tokyo.
- 504 27. Li L, Stoeckert CJ, Roos DS. 2003. OrthoMCL: identification of ortholog groups for  
505 eukaryotic genomes. *Genome Res* 13:2178–2189.

506

- 507 28. Varghese NJ, Mukherjee S, Ivanova N, Konstantinidis KT, Mavrommatis K, Kyrpides NC,  
508 Pati A. 2015. Microbial species delineation using whole genome sequences. *Nucleic Acids*  
509 *Res* 43:6761–6771.
- 510 29. Sagona S, Turchi B, Fratini F, Giusti M, Bull BT. 2015. Preliminary evaluation of glucose  
511 oxidase and its products in vitro antimicrobial activities on *Paenibacillus* larvae ATCC9545  
512 vegetative form. *Bulletin of Insectology* 68:233–237.
- 513 30. Furusawa T, Rakwal R, Nam HW, Shibato J, Agrawal GK, Kim YS, Ogawa Y, Yoshida Y,  
514 Kouzuma Y, Masuo Y, Yonekura M. 2008. Comprehensive Royal Jelly (RJ) Proteomics  
515 Using One- and Two-Dimensional Proteomics Platforms Reveals Novel RJ Proteins and  
516 Potential Phospho/Glycoproteins. *J Proteome Res* 7:3194–3229.
- 517 31. Li J, Wang T, Zhang Z, Pan Y. 2007. Proteomic analysis of royal jelly from three strains of  
518 western honeybees (*Apis mellifera*). *J Agric Food Chem* 55:8411–8422.
- 519 32. Schönleben S, Sickmann A, Mueller MJ, Reinders J. 2007. Proteome analysis of *Apis*  
520 *mellifera* royal jelly. *Anal Bioanal Chem* 389:1087–1093.
- 521 33. Lee FJ, Miller KI, McKinlay JB, Newton ILG. 2018. Differential carbohydrate utilization and  
522 organic acid production by honey bee symbionts. *FEMS Microbiol Ecol*.
- 523 34. Mates AK, Sayed AK, Foster JW. 2007. Products of the *Escherichia coli* acid fitness island  
524 attenuate metabolite stress at extremely low pH and mediate a cell density-dependent  
525 acid resistance. *J Bacteriol* 189:2759–2768.
- 526 35. Anderson KE, Sheehan TH, Eckholm BJ, Mott BM, DeGrandi-Hoffman G. 2011. An  
527 emerging paradigm of colony health: microbial balance of the honey bee and hive (*Apis*  
528 *mellifera*). *Insect Soc* 58:431–444.
- 529 36. Tung TT, Jakobsen TH, Dao TT, Fuglsang AT, Givskov M, Christensen SB, Nielsen J. 2017.  
530 Fusaric acid and analogues as Gram-negative bacterial quorum sensing inhibitors. *Eur J*  
531 *Med Chem* 126:1011–1020.
- 532 37. Crutcher FK, Puckhaber LS, Stipanovic RD, Bell AA, Nichols RL, Lawrence KS, Liu J. 2017.  
533 Microbial Resistance Mechanisms to the Antibiotic and Phytotoxin Fusaric Acid. *J Chem*  
534 *Ecol* 43:996–1006.
- 535 38. Coleman SA, Minnick MF. 2001. Establishing a direct role for the *Bartonella bacilliformis*  
536 invasion-associated locus B (IaIB) protein in human erythrocyte parasitism. *Infect Immun*  
537 69:4373–4381.
- 538 39. Gogarten JP, Doolittle WF, Lawrence JG. 2002. Prokaryotic evolution in light of gene  
539 transfer. *Mol Biol Evol* 19:2226–2238.

540

- 541 40. Nakamura Y, Itoh T, Matsuda H, Gojobori T. 2004. Biased biological functions of  
542 horizontally transferred genes in prokaryotic genomes. *Nat Genet* 36:760–766.
- 543 41. Wiedenbeck J, Cohan FM. 2011. Origins of bacterial diversity through horizontal genetic  
544 transfer and adaptation to new ecological niches. *FEMS Microbiol Rev* 35:957–976.
- 545 42. Roberts AP, Kreth J. 2014. The impact of horizontal gene transfer on the adaptive ability  
546 of the human oral microbiome. *Front Cell Infect Microbiol* 4:1.
- 547 43. Casas V, Maloy S. 2011. Role of bacteriophage-encoded exotoxins in the evolution of  
548 bacterial pathogens. *Future Microbiol* 6:1461–1473.
- 549 44. Koskella B, Brockhurst MA. 2014. Bacteria-phage coevolution as a driver of ecological and  
550 evolutionary processes in microbial communities. *FEMS Microbiol Rev* 38:916–931.
- 551 45. Harrison E, Hall JPJ, Paterson S, Spiers AJ, Brockhurst MA. 2017. Conflicting selection  
552 alters the trajectory of molecular evolution in a tripartite bacteria-plasmid-phage  
553 interaction. *Mol Ecol* 26:2757–2764.
- 554 46. Makarova KS, Wolf YI, Snir S, Koonin EV. 2011. Defense islands in bacterial and archaeal  
555 genomes and prediction of novel defense systems. *J Bacteriol* 193:6039–6056.
- 556 47. Rodic A, Blagojevic B, Zdobnov E, Djordjevic M, Djordjevic M. 2017. Understanding key  
557 features of bacterial restriction-modification systems through quantitative modeling.  
558 *BMC Systems Biology* 2017 11:1 11:1–15.
- 559 48. Iyer LM, Abhiman S, Aravind L. 2008. MutL homologs in restriction-modification systems  
560 and the origin of eukaryotic MORC ATPases. *Biol Direct* 3.
- 561 49. Freeman CE, Madroño RW. 1985. Some floral nectar-sugar compositions of species from  
562 southeastern Arizona and southwestern New Mexico. *Madrono* 32:78–86.
- 563 50. Love DC, Hanover JA. 2005. The hexosamine signaling pathway: deciphering the "O-  
564 GlcNAc code". *Sci STKE* 2005:re13–re13.
- 565 51. Ostrowski A, Gundogdu M, Ferenbach AT, Lebedev AA, van Aalten DMF. 2015. Evidence  
566 for a Functional O-Linked N-Acetylglucosamine (O-GlcNAc) System in the Thermophilic  
567 Bacterium *Thermobaculum terrenum*. *J Biol Chem* 290:30291–30305.
- 568 52. Shen A, Kamp HD, Grundling A, Higgins DE. 2006. A bifunctional O-GlcNAc transferase  
569 governs flagellar motility through anti-repression. *Genes Dev* 20:3283–3295.
- 570 53. Sokol KA, Olszewski NE. 2015. The Putative Eukaryote-Like O-GlcNAc Transferase of the  
571 Cyanobacterium *Synechococcus elongatus* PCC 7942 Hydrolyzes UDP-GlcNAc and Is  
572 Involved in Multiple Cellular Processes. *J Bacteriol* 197:354–361.



- 573 54. Galán JE. 2009. Common themes in the design and function of bacterial effectors. *Cell*  
574 *Host Microbe* 5:571–579.
- 575 55. Makarova KS, Aravind L, Wolf YI, Tatusov RL, Minton KW, Koonin EV, Daly MJ. 2001.  
576 Genome of the extremely radiation-resistant bacterium *Deinococcus radiodurans* viewed  
577 from the perspective of comparative genomics. *Microbiol Mol Biol Rev* 65:44–79.
- 578 56. Iyer LM, Abhiman S, Aravind L. 2011. Natural History of Eukaryotic DNA Methylation  
579 Systems. *Progress in Molecular Biology and Translational Science* 101:25–104.
- 580 57. Jacob F. 1954. Induced biosynthesis and mode of action of a pyocine, antibiotic produced  
581 by *Pseudomonas aeruginosa*. *Ann Inst Pasteur (Paris)* 86:149–160.
- 582 58. Michel-Briand Y, Baysse C. 2002. The pyocins of *Pseudomonas aeruginosa*. *Biochimie*  
583 84:499–510.
- 584 59. Flores-Kim J, Darwin AJ. 2016. The Phage Shock Protein Response. *Annu Rev Microbiol*  
585 70:83–101.
- 586 60. Kobayashi I. 2001. Behavior of restriction-modification systems as selfish mobile  
587 elements and their impact on genome evolution. *Nucleic Acids Res* 29:3742–3756.
- 588 61. Van Etten JL, Xia YN, Burbank DE, Narva KE. 1988. *Chlorella* Viruses Code for Restriction  
589 and Modification Enzymes. *Gene* 74:113–115.
- 590 62. Newton I, Miller KI, Franklin CD, Mattila HR. 2018. Social communication between  
591 microbes colonizing the social honey bee *Apis mellifera*. *bioRxiv* 287995.
- 592 63. Quast C, Pruesse E, Yilmaz P, Gerken J, Schweer T, Yarza P, Peplies J, Gloeckner FO. 2013.  
593 The SILVA ribosomal RNA gene database project: improved data processing and web-  
594 based tools. *Nucleic Acids Res* 41:D590–D596.
- 595 64. Yilmaz P, Parfrey LW, Yarza P, Gerken J, Pruesse E, Quast C, Schweer T, Peplies J, Ludwig  
596 W, Gloeckner FO. 2014. The SILVA and “All-species Living Tree Project (LTP)” taxonomic  
597 frameworks. *Nucleic Acids Res* 42:D643–D648.
- 598 65. Gloeckner FO, Yilmaz P, Quast C, Gerken J, Beccati A, Ciuprina A, Bruns G, Yarza P, Peplies  
599 J, Westram R, Ludwig W. 2017. 25 years of serving the community with ribosomal RNA  
600 gene reference databases and tools. *J Biotechnol* 261:169–176.
- 601 66. Li L, Praet J, Borremans W, Nunes OC, Manaia CM, Cleenwerck I, Meeus I, Smagghe G, De  
602 Vuyst L, Vandammel P. 2015. *Bombella intestini* gen. nov., sp nov., an acetic acid  
603 bacterium isolated, from bumble bee crop. *Int J Syst Evol Microbiol* 65:267–273.

604

- 605 67. Yun J-H, Lee J-Y, Hyun D-W, Jung M-J, Bae J-W. 2017. *Bombella apis* sp nov., an acetic  
606 acid bacterium isolated from the midgut of a honey bee. *Int J Syst Evol Microbiol*  
607 67:2184–2188.
- 608 68. Pruesse E, Peplies J, Gloeckner FO. 2012. SINA: Accurate high-throughput multiple  
609 sequence alignment of ribosomal RNA genes. *Bioinformatics* 28:1823–1829.
- 610 69. Stamatakis A. 2006. RAxML-VI-HPC: maximum likelihood-based phylogenetic analyses  
611 with thousands of taxa and mixed models. *Bioinformatics* 22:2688–2690.
- 612 70. Katoh K, Misawa K, Kuma KI, Miyata T. 2002. MAFFT: a novel method for rapid multiple  
613 sequence alignment based on fast Fourier transform. *Nucleic Acids Res* 30:3059–3066.
- 614 71. Darling A, Mau B, Blattner FR, Perna NT. 2004. Mauve: Multiple alignment of conserved  
615 genomic sequence with rearrangements. *Genome Res* 14:1394–1403.
- 616 72. Darling AE, Mau B, Perna NT. 2010. progressiveMauve: Multiple Genome Alignment with  
617 Gene Gain, Loss and Rearrangement. *PLoS ONE* 5.
- 618 73. Grissa I, Vergnaud G, Pourcel C. 2007. CRISPRFinder: a web tool to identify clustered  
619 regularly interspaced short palindromic repeats. *Nucleic Acids Res* 35:W52–W57.
- 620 74. Zhou Y, Liang Y, Lynch KH, Dennis JJ, Wishart DS. 2011. PHAST: A Fast Phage Search Tool.  
621 *Nucleic Acids Res* 39:W347–W352.
- 622 75. Arndt D, Grant JR, Marcu A, Sajed T, Pon A, Liang Y, Wishart DS. 2016. PHASTER: a better,  
623 faster version of the PHAST phage search tool. *Nucleic Acids Res* 44:W16–W21.
- 624 76. Kanehisa M, Sato Y, Morishima K. 2016. BlastKOALA and GhostKOALA: KEGG Tools for  
625 Functional Characterization of Genome and Metagenome Sequences. *Journal of*  
626 *Molecular Biology* 428:726–731.
- 627 77. Podell S, Gaasterland T. 2007. DarkHorse: a method for genome-wide prediction of  
628 horizontal gene transfer. *Genome Biol* 8.
- 629 78. Soding J. 2005. Protein homology detection by HMM-HMM comparison. *Bioinformatics*  
630 21:951–960.
- 631 79. Ge X, Zhao Y, Hou W, Zhang W, Chen W, Wang J, Zhao N, Lin J, Wang W, Chen M, Wang  
632 Q, Jiao Y, Yuan Z, Xiong X. 2013. Complete Genome Sequence of the Industrial Strain  
633 *Gluconobacter oxydans* H24. *Genome Announc* 1:e00003–13–e00003–13.

634

635

636 **Table 1. Genome names, accession number, and isolation sources for complete genomes used**  
 637 **in these analyses. *Parasaccharibacter apium* G7\_7\_3c is the *P. apium* reference genome.**

| Genome                                  | GenBank accession number | Isolation source                  |
|-----------------------------------------|--------------------------|-----------------------------------|
| <i>Parasaccharibacter apium</i> G7_7_3c | GCA_002079945.1          | <i>Apis mellifera</i> hindgut(18) |
| <i>Parasaccharibacter apium</i> A29     | GCA_002917995.1          | <i>Apis mellifera</i> larva(18)   |
| <i>Parasaccharibacter apium</i> B8      | GCA_002917945.1          | <i>Apis mellifera</i> larva(18)   |
| <i>Parasaccharibacter apium</i> C6      | GCA_002917985.1          | <i>Apis mellifera</i> larva(18)   |
| <i>Parasaccharibacter apium</i> AS1     | GCA_002592045.1          | <i>Apis mellifera</i> larva       |
| <i>Saccharibacter</i> sp. AM169         | GCA_000723565.1          | <i>Apis mellifera</i> stomach(20) |
| <i>Saccharibacter</i> sp. M18           | GCA_002150105.1          | <i>Apis mellifera</i> stomach(21) |
| <i>Saccharibacter</i> sp. 3.A.1         | GCA_002150125.1          | Honey(21)                         |
| <i>Saccharibacter floricola</i>         | GCA_000378165.1          | Flower(19)                        |
| <i>Bombella intestini</i>               | GCA_002003665.1          | <i>Bombus lapidarius</i> crop(22) |
| <i>Gluconobacter oxydans</i> H24        | GCA_000311765.1          | Industrial sample(79)             |

638

639 **FIGURES AND LEGENDS**

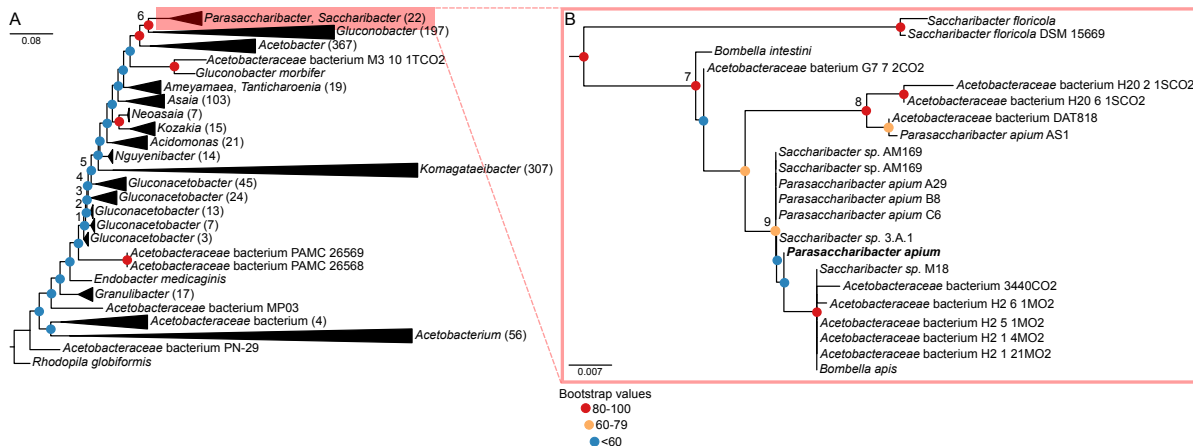

640

641 **Figure 1.** Maximum likelihood phylogenetic tree of Acetic Acid Bacteria constructed from full-  
 642 length 16S rRNA sequences. Bootstrap scores are indicated at each node, and numbers at  
 643 certain nodes are for reference in the main text. A) Full tree of all 17 genera of Acetic Acid  
 644 Bacteria. Clades were collapsed based on genus. Genera that make up at least 40% of the  
 645 sequences in a clade are listed, except for the highlighted clade. Numbers in parentheses  
 646 represent the total number of sequences in each collapsed clade (Supplemental File S3 for full  
 647 tree). B) Zoomed-in look at the *Parasaccharibacter*/*Saccharibacter* clade. The bolded  
 648 *Parasaccharibacter apium* represents the reference *P. apium* sequence.

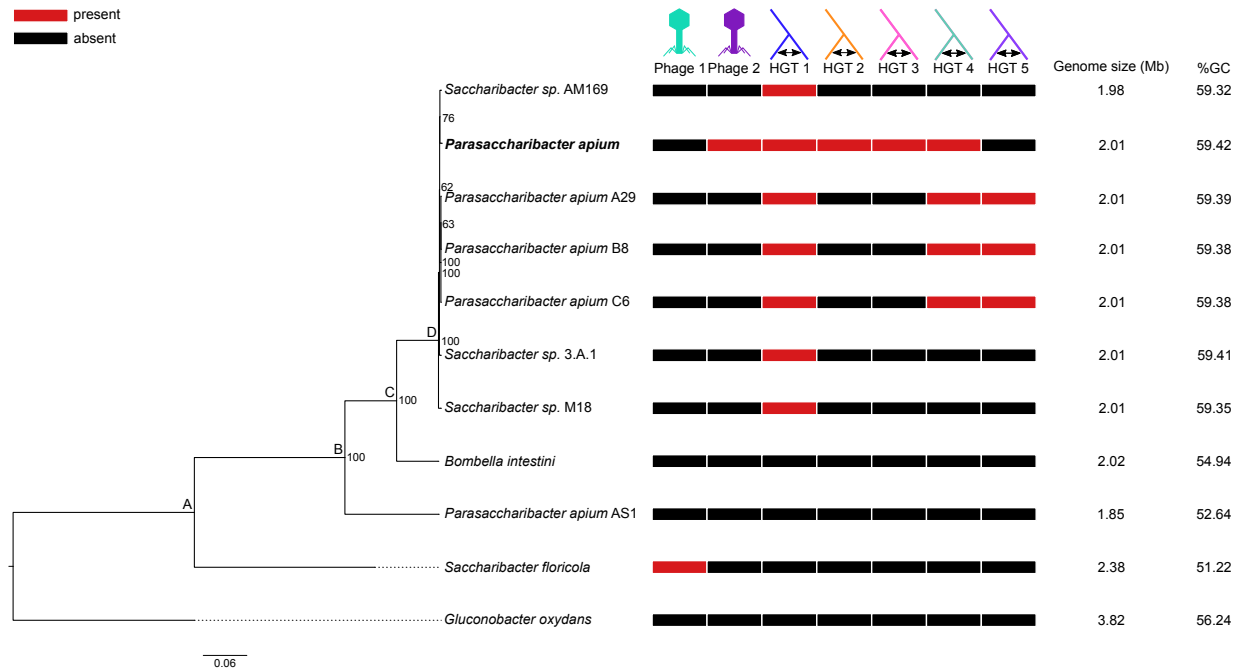

649

650 **Figure 2.** Maximum likelihood phylogenetic tree of the *Parasaccharibacter/Saccharibacter* clade  
 651 constructed from concatenated amino acid alignment of 1259 single copy orthologous genes.  
 652 Bootstrap scores are indicated at each node. Letters at certain nodes are for reference in the  
 653 main text. Colored boxes represent the presence (red) or absence (black) of each of 7 genomic  
 654 regions of interest. Genome size and %GC are also displayed. Bolded *Parasaccharibacter apium*  
 655 represents the reference *P. apium* sequence.

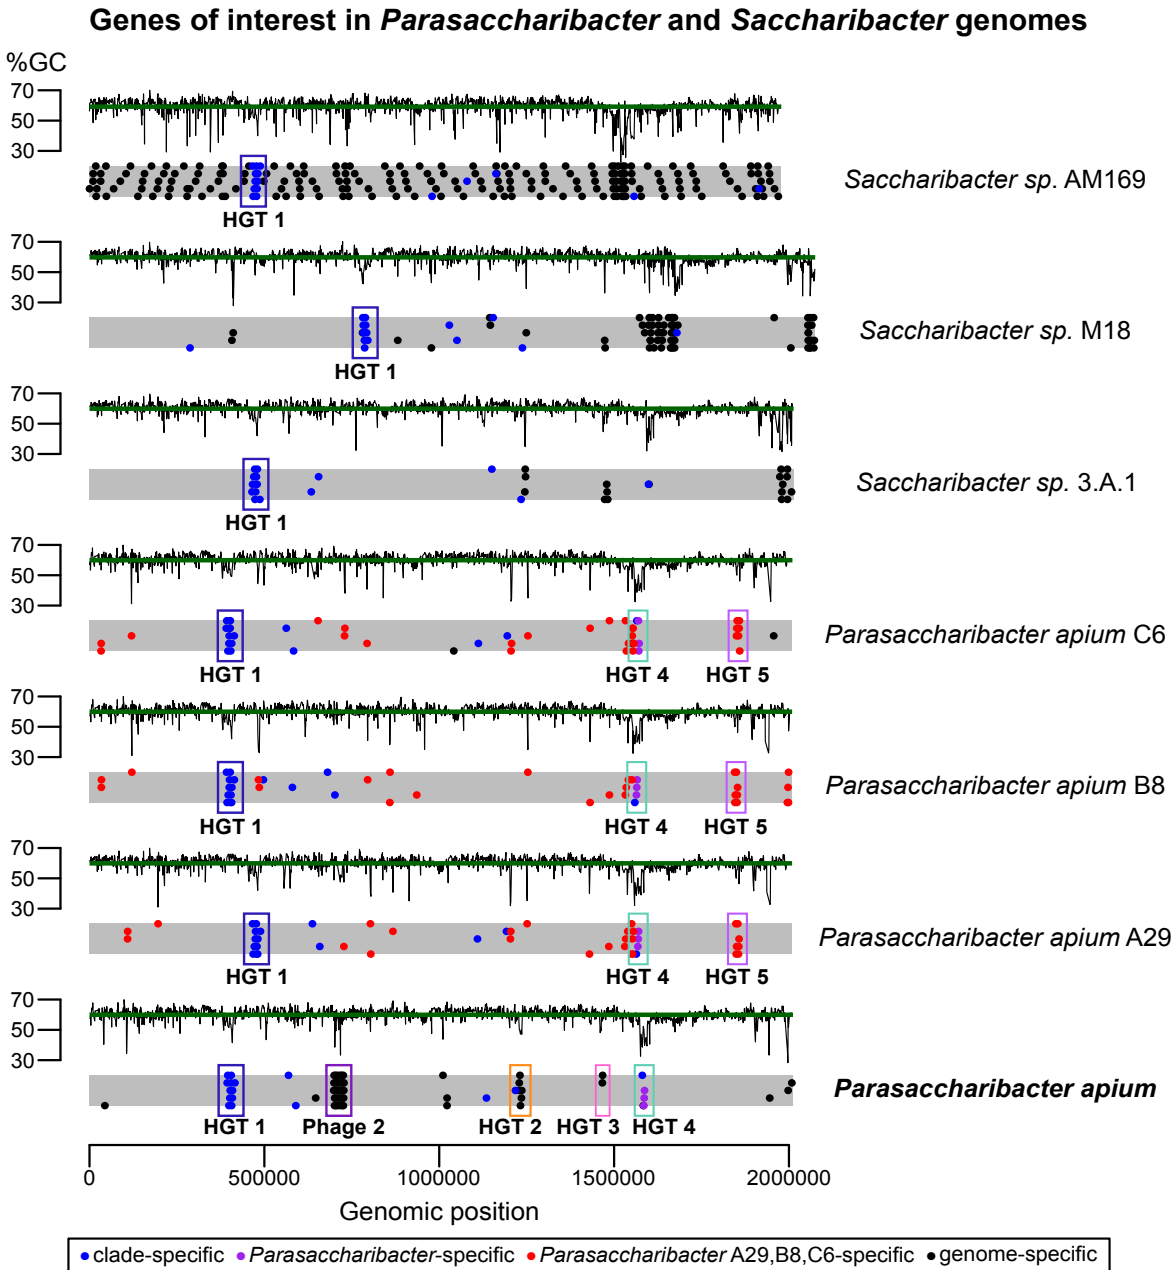

656

657 **Figure 3.** Genomic locations of genes of interest in *Parasaccharibacter* and *Saccharibacter*  
 658 genomes. Each gray bar is a representation of the genome, with each dot representing the  
 659 location of a gene in each of four categories (see legend). Regions of interest mentioned in the  
 660 text are highlighted and labeled. %GC for every gene is plotted above each genome  
 661 representation, with the green line indicating the genome-wide average %GC. Bolded  
 662 *Parasaccharibacter apium* represents the *P. apium* reference sequence.  
 663

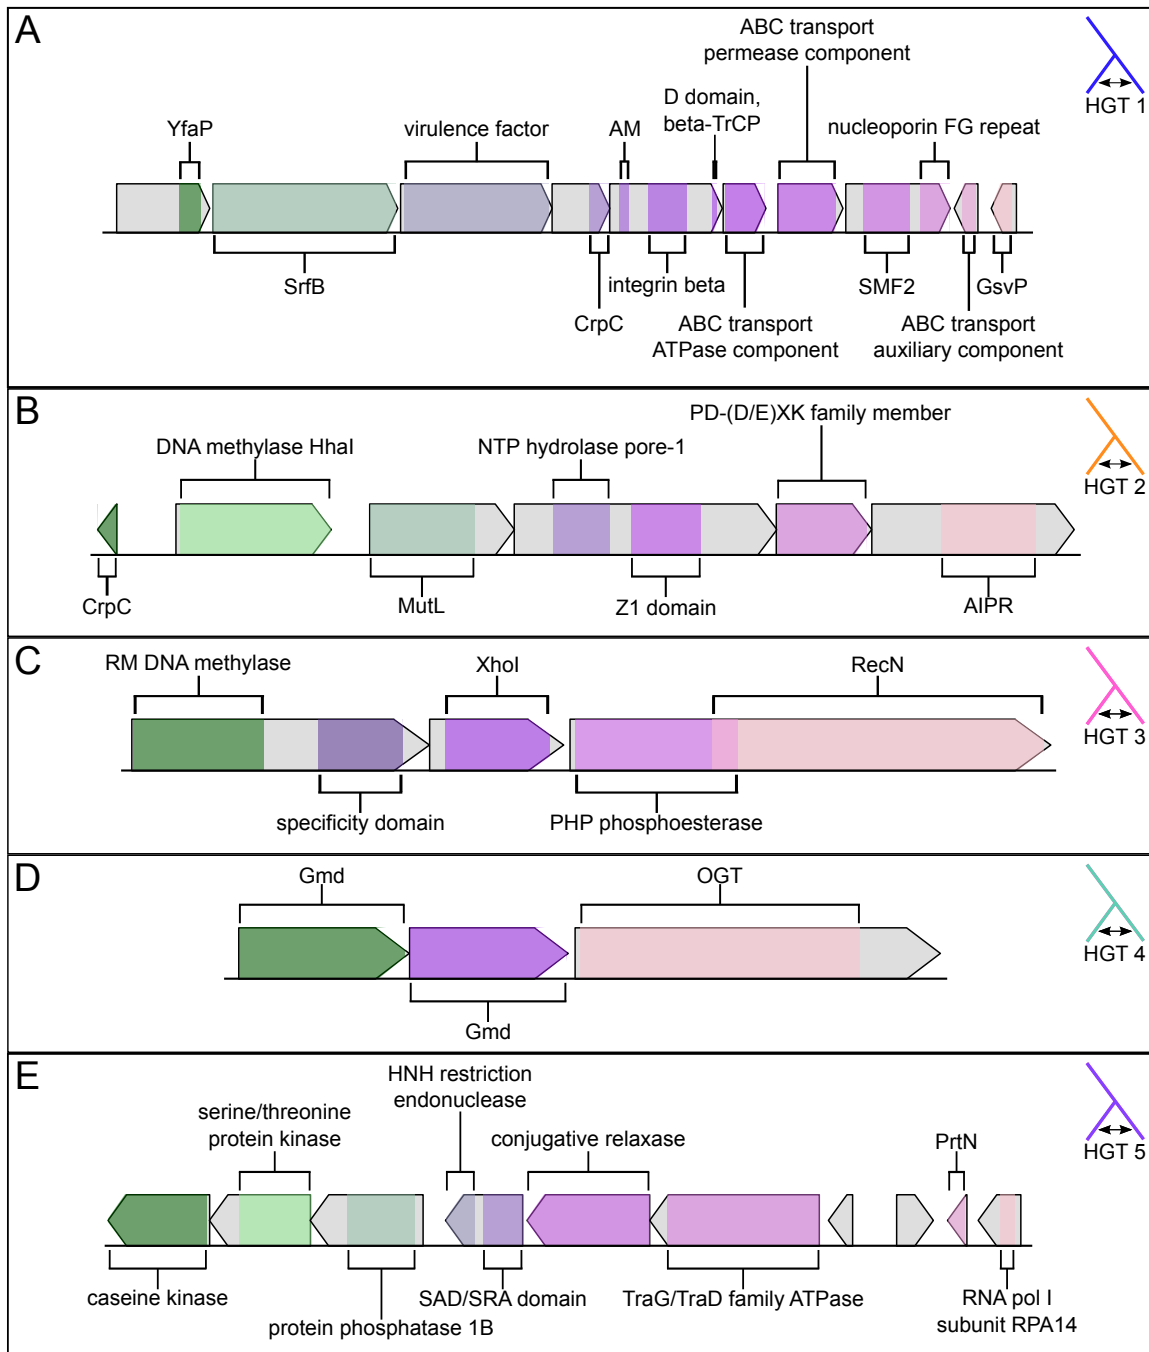

664  
 665 **Figure 4.** Gene models for each of 5 genomic regions of interest. Gene models are drawn to  
 666 scale within each panel, but not across panels. A) HGT1. Abbreviations are: CrpC: cysteine rich  
 667 protein C, AM: automated matches, SMF2: sulfatase modifying factor 2, GsvP: gas vesicle  
 668 protein C. B) HGT2. Abbreviations are: CrpC: cysteine rich protein C, AIPR: abortive infection  
 669 phage resistance protein. C) HGT3. Abbreviations are: RM: restriction-modification. D) HGT 4.  
 670 Abbreviations are: Gmd: GDP-D-mannose dehydratase, OGT: O-linked N-acetylglucosamine  
 671 transferase OGT. E) HGT5. Abbreviations are: SAD/SRA: SET and Ring finger Associated, PrtN:  
 672 pyocin activator protein.

673 **SUPPLEMENTAL FIGURES AND TABLE LEGENDS**

674 **Table S1.** OrthoMCL clusters and gene counts for each type of COG in each genome.

675 **Table S2.** Accession number, annotation source, annotation score, and putative annotation for  
676 each of the bee-specific genes identified.

677 **Table S3.** Accession number, annotation source, annotation score, and putative annotation for  
678 each of the *Bombella intestini* genes identified.

679 **Table S4.** %GC and LPI-difference standard deviations for each gene in each genome harboring  
680 each HGT.

681 **Table S5.** Positions and spacer counts for each CRISPR array identified in the *Parasaccharibacter*  
682 clade genomes.

683 **Figure S1.** Pairwise genome-wide average nucleotide identity (gANI) for all genomes analyzed.

684 **Figure S2.** Pairwise aligned fraction (AF) for all genomes analyzed.

685 **Supplemental file S1.** Supplemental methods and results.

686 **Supplemental file S2.** BLAST results for genes present in phage 1, present in *Saccharibacter*  
687 *floricola*.

688 **Supplemental file S3.** BLAST results for genes present in phage 2, present in the  
689 *Parasaccharibacter apium* reference sequence.

690 **Supplemental file S4.** Newick format file for complete 16S rRNA gene tree (Figure 1).
