# Supplementary material for: Genomic signatures of honey bee association in an acetic acid symbiont
Source: bioRxiv or medRxiv preprint supplement (doi:10.1101/367490), 2020-05-07
Supplement: Supplementary file [file 367490-3.pdf]

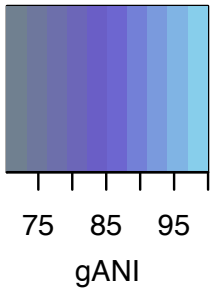

## Pairwise gANI

|                             |      |      |      |      |      |      |      |      |      |      |      |                             |
|-----------------------------|------|------|------|------|------|------|------|------|------|------|------|-----------------------------|
| saccharibacter_am169        | 100  | 99.3 | 99.3 | 99.3 | 99.3 | 99.2 | 98.8 | 83   | 76   | 71.9 | 71.9 | saccharibacter_am169        |
| parasaccharibacter_apium    | 99.3 | 100  | 99.4 | 99.4 | 99.4 | 99.3 | 98.9 | 83   | 76   | 71.9 | 71.9 | parasaccharibacter_apium    |
| parasaccharibacter_apium_a2 | 99.3 | 99.4 | 100  | 100  | 100  | 99.4 | 98.9 | 83   | 76   | 71.9 | 71.8 | parasaccharibacter_apium_a2 |
| parasaccharibacter_apium_b8 | 99.3 | 99.4 | 100  | 100  | 100  | 99.4 | 98.9 | 83   | 76   | 71.9 | 71.8 | parasaccharibacter_apium_b8 |
| parasaccharibacter_apium_c6 | 99.3 | 99.4 | 100  | 100  | 100  | 99.4 | 98.9 | 83   | 76   | 71.9 | 71.8 | parasaccharibacter_apium_c6 |
| saccharibacter_3.A.1        | 99.2 | 99.3 | 99.4 | 99.4 | 99.4 | 100  | 98.9 | 83   | 76   | 71.9 | 71.8 | saccharibacter_3.A.1        |
| saccharibacter_m18          | 98.8 | 98.9 | 98.9 | 98.9 | 98.9 | 98.9 | 100  | 83.1 | 76.1 | 71.9 | 71.8 | saccharibacter_m18          |
| bombella_intestini          | 83   | 83   | 83   | 83   | 83   | 83   | 83.1 | 100  | 76.4 | 71.9 | 71.5 | bombella_intestini          |
| parasaccharibacter_apium_as | 76   | 76   | 76   | 76   | 76   | 76   | 76.1 | 76.4 | 100  | 71.9 | 70.5 | parasaccharibacter_apium_as |
| saccharibacter_floricola    | 71.9 | 71.9 | 71.9 | 71.9 | 71.9 | 71.9 | 71.9 | 71.9 | 71.9 | 100  | 70.4 | saccharibacter_floricola    |
| gluconobacter_oxydans       | 71.9 | 71.9 | 71.8 | 71.8 | 71.8 | 71.8 | 71.8 | 71.5 | 70.5 | 70.4 | 100  | gluconobacter_oxydans       |
