# Supplementary material for: Genomic signatures of honey bee association in an acetic acid symbiont
Source: bioRxiv or medRxiv preprint supplement (doi:10.1101/367490), 2020-05-07
Supplement: Supplementary file [file 367490-4.pdf]

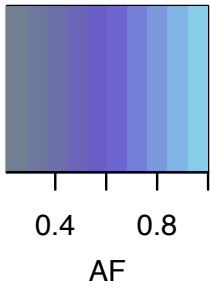

## Pairwise aligned fraction (AF)

|      |      |      |      |      |      |      |      |      |      |      |      |                             |
|------|------|------|------|------|------|------|------|------|------|------|------|-----------------------------|
| 1    | 0.94 | 0.94 | 0.94 | 0.94 | 0.94 | 0.94 | 0.94 | 0.9  | 0.74 | 0.42 | 0.34 | saccharibacter_am169        |
| 0.94 | 1    | 0.96 | 0.96 | 0.96 | 0.96 | 0.94 | 0.94 | 0.9  | 0.74 | 0.42 | 0.34 | parasaccharibacter_apium    |
| 0.94 | 0.96 | 1    | 0.99 | 0.99 | 0.96 | 0.94 | 0.94 | 0.9  | 0.74 | 0.42 | 0.34 | parasaccharibacter_apium_a2 |
| 0.94 | 0.96 | 0.99 | 1    | 0.99 | 0.96 | 0.94 | 0.94 | 0.9  | 0.74 | 0.32 | 0.34 | parasaccharibacter_apium_b8 |
| 0.94 | 0.96 | 0.99 | 0.99 | 1    | 0.96 | 0.94 | 0.94 | 0.9  | 0.74 | 0.32 | 0.34 | parasaccharibacter_apium_c6 |
| 0.94 | 0.96 | 0.96 | 0.96 | 0.96 | 1    | 0.96 | 0.94 | 0.9  | 0.74 | 0.42 | 0.34 | saccharibacter_3.A.1        |
| 0.94 | 0.94 | 0.94 | 0.94 | 0.94 | 0.96 | 1    | 0.94 | 0.9  | 0.72 | 0.42 | 0.33 | saccharibacter_m18          |
| 0.9  | 0.9  | 0.9  | 0.9  | 0.9  | 0.9  | 0.9  | 1    | 0.94 | 0.74 | 0.46 | 0.29 | bombella_intestini          |
| 0.74 | 0.74 | 0.74 | 0.74 | 0.74 | 0.74 | 0.72 | 0.75 | 1    | 0.5  | 0.21 | 0.21 | parasaccharibacter_apium_as |
| 0.42 | 0.42 | 0.42 | 0.42 | 0.42 | 0.42 | 0.42 | 0.46 | 0.5  | 1    | 0.23 | 0.23 | sacchariabcter_floricola    |
| 0.34 | 0.34 | 0.34 | 0.34 | 0.34 | 0.34 | 0.34 | 0.29 | 0.21 | 0.23 | 1    | 0.23 | gluconobacter_oxydans       |
